# Supplementary material
Source: HighWire-hosted journal article supplement (https://bmjopen.bmj.com/content/10/6/e034317)
Supplement: inline-supplementary-material-1 [file inline-supplementary-material-1.pdf]

**Supplemental Table 1 Socioeconomic structures of all permanent residents of Luohu district and Shenzhen city in 2018**

|                                           | Luohu district<br>(n=103.99×10 <sup>4</sup> ) | Shenzhen city<br>(n=1302.66×10 <sup>4</sup> ) |
|-------------------------------------------|-----------------------------------------------|-----------------------------------------------|
| Sex (n, %)                                |                                               |                                               |
| male                                      | 559,952 (53.85)                               | 7,250,711 (55.66)                             |
| female                                    | 479,948 (46.15)                               | 5,775,877 (44.34)                             |
| Age (years, (n, %))                       |                                               |                                               |
| 0-14                                      | 139,625 (13.43)                               | 1,569,745 (13.03)                             |
| 15-59                                     | 826,107 (79.44)                               | 10,878,040 (83.51)                            |
| 60-                                       | 74,168 (7.13)                                 | 578,803 (4.44)                                |
| Education level (n, %)                    |                                               |                                               |
| Illiteracy                                | 8735 (0.84)                                   | 96,379 (0.74)                                 |
| Primary school                            | 111,477 (10.72)                               | 1,217,936 (9.34)                              |
| High school                               | 814,554 (78.33)                               | 10,612,306 (81.47)                            |
| University                                | 105,134 (10.11)                               | 1,099,967 (8.44)                              |
| Annual per capita disposable income (RMB) | 60,595                                        | 57,543                                        |
| Total assets (100 million RMB)            | 4702                                          | 47120                                         |

Data on the demographics of the permanent residents were presented.

**Supplemental Table 2. Comparisons of the distributions of age and sex among elderly permanent residents in Shenzhen city, Luohu district and our cohort**

|                     | Shenzhen Aging-<br>Related Disorder cohort | Luohu district | Shenzhen city   |
|---------------------|--------------------------------------------|----------------|-----------------|
| Sex (n, %)          |                                            |                |                 |
| male                | 4022 (42.73)                               | 37,492 (50.55) | 290,001 (50.10) |
| female              | 5389 (57.26)                               | 36,676 (49.45) | 288,802 (49.90) |
| Age (years, (n, %)) |                                            |                |                 |
| 60-69               | 6416 (68.18)                               | 48,937 (65.98) | 394,769 (68.20) |
| ≥70                 | 2995 (31.82)                               | 25,231 (34.02) | 184,034 (31.80) |

**Supplemental Table 3 The list of biochemical analysis of biosamples at baseline in the Shenzhen Aging-Related Disorder Cohort**

| Categories                                | Measurements                                                                                                                                                                                                                                                                                                                        |
|-------------------------------------------|-------------------------------------------------------------------------------------------------------------------------------------------------------------------------------------------------------------------------------------------------------------------------------------------------------------------------------------|
| <b>Blood routine</b>                      | white blood cell counts (WBC), red blood cell counts (RBC), hemoglobin contents, platelet counts                                                                                                                                                                                                                                    |
| <b>Lipid levels</b>                       | total cholesterol (TCHO), triglyceride (TG), low density lipoprotein cholesterol (LDL-C) and high density lipoprotein cholesterol (HDL-C)                                                                                                                                                                                           |
| <b>Blood glucose</b>                      | fasting plasma glucose, glycated hemoglobin                                                                                                                                                                                                                                                                                         |
| <b>Homocysteine</b>                       |                                                                                                                                                                                                                                                                                                                                     |
| <b>Hepatic function</b>                   | total protein, albumin, total bilirubin (TB), alanine aminotransferase (ALT) and aspartate aminotransferase (AST)                                                                                                                                                                                                                   |
| <b>Kidney function</b>                    | creatinine, uric acid and urea nitrogen                                                                                                                                                                                                                                                                                             |
| <b>Tumor biomarkers</b>                   | carcino-embryonic antigen (CEA) and alpha fetoprotein (AFP)                                                                                                                                                                                                                                                                         |
| <b>Epstein-Barr Virus (EBV) antibody</b>  |                                                                                                                                                                                                                                                                                                                                     |
| <b>Urine routine</b>                      | urine glucose, urine bilirubin, urine ketone, urine specific gravity, pH, urine protein, urobilinogen qualitative, urine nitrite, urine WBC, urine latent blood                                                                                                                                                                     |
| <b>Urine metals</b>                       | lithium, beryllium, aluminum, titanium, vanadium, chromium, manganese, iron, cobalt, nickel, copper, zinc, arsenic, selenium, rubidium, strontium, molybdenum, cadmium, indium, tin, antimony, barium, thallium, lead                                                                                                               |
| <b>Urine nicotine and its metabolites</b> | nicotine, cotinine, trans-3'-hydroxy cotinine, nicotine-N- $\beta$ -glucuronide, cotinine N- $\beta$ -D-glucuronide, trans-3'-hydroxy cotinine O- $\beta$ -D-glucuronide, (R,S)-nornicotine, (R,S)-norcotinine, (1'S,2'S)-nicotine-1'-oxide, (S)-cotinine N-Oxide, rac 4-Hydroxy-4-(3-pyridyl) butanoic Acid Dicyclohexylamine Salt |

**Supplemental Table 4 Summary of the instruments messages for clinical indicators analysis at baseline**

| Items                                  | Equipment used                                                                                                                                                              |
|----------------------------------------|-----------------------------------------------------------------------------------------------------------------------------------------------------------------------------|
| Standing height                        | HNH-219, OMRON Healthcare Co., Ltd, Japan                                                                                                                                   |
| Body weight                            | HNH-219, OMRON Healthcare Co., Ltd, Japan                                                                                                                                   |
| Resting blood pressure                 | HBP-1300, OMRON Healthcare Co., Ltd, Japan                                                                                                                                  |
| 12-lead electrocardiography            | ECG-1350c, Nihon Kohden Corporation, Japan                                                                                                                                  |
| Chest X-ray                            | Optimus, Royal Dutch Philips Electronics Ltd., Netherlands                                                                                                                  |
| Abdominal B-type ultrasound inspection | Affiniti50, Royal Dutch Philips Electronics Ltd., Netherlands<br>EPIQ5, Royal Dutch Philips Electronics Ltd., Netherlands<br>S25, SonoScape Medical Corp., Guangdong, China |
| Fasting plasma glucose                 | 7600-010, Hitachi, Ltd., Tokyo, Japan                                                                                                                                       |
| Glycated hemoglobin                    | Premier Hb9210, Trinity Biotech Plc., Bray, Ireland                                                                                                                         |
| Homocysteine                           | AU5800, Beckman Coulter, Inc., California, USA                                                                                                                              |
| Blood lipids                           | 7600-010, Hitachi, Ltd., Tokyo, Japan                                                                                                                                       |
| Hepatic function                       | 7600-010, Hitachi, Ltd., Tokyo, Japan                                                                                                                                       |
| Renal function                         | 7600-010, Hitachi, Ltd., Tokyo, Japan                                                                                                                                       |
| Blood routine                          | XT-1800I, SYSMEX Corporation, Japan                                                                                                                                         |
| EB virus                               | Uranus AE100, Aikang Medtech Co., Ltd, China                                                                                                                                |
| Tumor biomarkers                       | Uranus AE100, Aikang Medtech Co., Ltd, China                                                                                                                                |
| Urine routine                          | URIT-500B, URIT Medical Electronic Group Co., China                                                                                                                         |
| Bone mineral density                   | MetriScan, Miles Medical Inc., California, USA<br>BMD-1000D, Hongyang Medical Apparatus Co., Ltd, China                                                                     |

---

|                                   |                                                                                |
|-----------------------------------|--------------------------------------------------------------------------------|
| Body water                        | Inbody 570, InBody Co., Ltd, Seoul, Korea                                      |
| Body protein                      | Inbody 570, InBody Co., Ltd, Seoul, Korea                                      |
| Body minerals                     | Inbody 570, InBody Co., Ltd, Seoul, Korea                                      |
| Body muscle                       | Inbody 570, InBody Co., Ltd, Seoul, Korea                                      |
| Skeletal muscle mass              | Inbody 570, InBody Co., Ltd, Seoul, Korea                                      |
| Body fat                          | Inbody 570, InBody Co., Ltd, Seoul, Korea                                      |
| Body cell count                   | Inbody 570, InBody Co., Ltd, Seoul, Korea                                      |
| Basal metabolic rate              | Inbody 570, InBody Co., Ltd, Seoul, Korea                                      |
| Waist circumference               | Inbody 570, InBody Co., Ltd, Seoul, Korea                                      |
| Hip circumference                 | Inbody 570, InBody Co., Ltd, Seoul, Korea                                      |
| Bio-electrical impedance          | Inbody 570, InBody Co., Ltd, Seoul, Korea                                      |
| Urine metals                      | NEXION 300X PerkinElmer Inc., USA                                              |
| Urine nicotine and its metabolite | 1200 series/ 6410 Triple Quad LC/MS Agilent Technologies Inc., California, USA |

---

**Supplemental Table 5 Comparisons between the individuals with and without body component data at baseline**

| Variables                                     | Participants with body component (n=3292 ) | Participants without body component (n=6119 ) | t/x <sup>2</sup> * | P      |
|-----------------------------------------------|--------------------------------------------|-----------------------------------------------|--------------------|--------|
| Age (years, mean±SD)                          | 67.54±5.25                                 | 67.83±5.50                                    | 2.56               | 0.01   |
| Male (n, %)                                   | 1327 (40.31)                               | 2695 (44.04)                                  | 12.19              | 0.0005 |
| Han Chinese (n, %)                            | 2954 (99.29)                               | 5623 (99.36)                                  | 0.14               | 0.70   |
| Education level (n, %)                        |                                            |                                               | 4.01               | 0.26   |
| Primary school or illiteracy                  | 547 (16.79)                                | 1090 (17.97)                                  |                    |        |
| Middle school                                 | 913 (28.03)                                | 1651 (27.23)                                  |                    |        |
| High school                                   | 1081 (33.19)                               | 2062 (34.00)                                  |                    |        |
| University or college or higher               | 716 (21.98)                                | 1261 (20.79)                                  |                    |        |
| Marital status (n, %)                         |                                            |                                               | 7.74               | 0.10   |
| Single                                        | 14 (0.43)                                  | 32 (0.53)                                     |                    |        |
| Married                                       | 2825 (87.60)                               | 5220 (86.86)                                  |                    |        |
| Widowed                                       | 336 (10.42)                                | 687 (11.43)                                   |                    |        |
| Divorced                                      | 48 (1.49)                                  | 71 (1.18)                                     |                    |        |
| Cohabited                                     | 2 (0.06)                                   | 0                                             |                    |        |
| Ever smoker (n, %)                            | 643 (19.64)                                | 1257 (20.69)                                  | 1.45               | 0.23   |
| Passive smoker (n, %)                         | 380 (11.63)                                | 674 (11.11)                                   | 0.57               | 0.45   |
| Ever drinker (n, %)                           | 485 (14.82)                                | 866 (14.25)                                   | 0.55               | 0.46   |
| Pittsburgh Sleep Quality Index (n, mean ± SD) | 4.33 ± 2.60                                | 4.12 ± 2.61                                   | -3.41              | 0.0006 |
| Physical active (n, %)                        | 2664 (81.24)                               | 4924 (81.28)                                  | 0.002              | 0.97   |
| Overweight/Obesity <sup>a</sup> (n, %)        | 1836 (56.04)                               | 3225 (53.47)                                  | 5.65               | 0.02   |

|                                            |                  |                  |       |       |
|--------------------------------------------|------------------|------------------|-------|-------|
| Hypertension <sup>b</sup> (n, %)           | 1846 (56.26)     | 3630 (59.58)     | 9.64  | 0.002 |
| Diabetes mellitus <sup>c</sup> (n, %)      | 732 (22.44)      | 1351 (22.23)     | 0.06  | 0.81  |
| Hyperlipidemia <sup>d</sup> (n, %)         | 2460 (75.07)     | 4637 (75.79)     | 1.04  | 0.31  |
| Chronic bronchitis <sup>e</sup> (n, %)     | 46 (1.41)        | 90 (1.48)        | 0.08  | 0.78  |
| COPD <sup>e</sup> (n, %)                   | 4 (0.12)         | 14 (0.23)        | 1.29  | 0.26  |
| Asthma <sup>e</sup> (n, %)                 | 15 (0.46)        | 26 (0.43)        | 0.05  | 0.83  |
| Tuberculosis <sup>e</sup> (n, %)           | 15 (0.46)        | 23 (0.38)        | 0.35  | 0.55  |
| Angina <sup>e</sup> (n, %)                 | 13 (0.40)        | 23 (0.38)        | 0.02  | 0.88  |
| Myocardial infarction <sup>e</sup> (n, %)  | 13 (0.40)        | 38 (0.63)        | 2.00  | 0.16  |
| Coronary heart disease <sup>e</sup> (n, %) | 203 (6.24)       | 327 (5.39)       | 2.84  | 0.09  |
| Stroke <sup>e</sup> (n, %)                 | 30 (0.92)        | 72 (1.19)        | 1.36  | 0.24  |
| Cancer <sup>e</sup> (n, %)                 | 80 (2.47)        | 123 (2.03)       | 1.89  | 0.17  |
| Chronic hepatitis <sup>e</sup> (n, %)      | 18 (0.55)        | 29 (0.48)        | 0.24  | 0.62  |
| Arthritis <sup>e</sup> (n, %)              | 138 (4.25)       | 331 (5.46)       | 6.48  | 0.01  |
| Migraine <sup>e</sup> (n, %)               | 20 (0.62)        | 38 (0.63)        | 0.004 | 0.95  |
| Nephritis <sup>e</sup> (n, %)              | 9 (0.28)         | 27 (0.45)        | 1.56  | 0.21  |
| Alzheimer's disease <sup>e</sup> (n, %)    | 6 (0.18)         | 11 (0.18)        | 0.001 | 0.97  |
| Parkinson's disease <sup>e</sup> (n, %)    | 8 (0.25)         | 13 (0.21)        | 0.10  | 0.76  |
| Brain injury <sup>e</sup> (n, %)           | 193 (5.96)       | 340 (5.64)       | 0.40  | 0.53  |
| MMSE score < 24 (n, %)                     | 167 (5.48)       | 301 (5.35)       | 0.07  | 0.79  |
| Depression status <sup>f</sup> (n, %)      | 126 (3.87)       | 177 (2.95)       | 5.63  | 0.02  |
| ADL (n, scores, mean $\pm$ SD)             | 14.09 $\pm$ 1.23 | 14.18 $\pm$ 1.73 | 2.82  | 0.005 |

|                                |                  |                  |       |       |
|--------------------------------|------------------|------------------|-------|-------|
| SSRS (n, score, mean $\pm$ SD) | 39.88 $\pm$ 7.68 | 39.36 $\pm$ 8.00 | -2.88 | 0.004 |
|--------------------------------|------------------|------------------|-------|-------|

ADL, activities of daily living; COPD, chronic obstructive pulmonary disease; MMSE, Mini-mental State Examination; SSRS, Social support rate scale; SD, standard deviation.

\*Student's t-test and Pearson  $\chi^2$  test were used for the comparisons between continuous variables and the categorical variables, respectively.

<sup>a</sup> Overweight/Obesity was defined as BMI at least 24 kg/m<sup>2</sup>.

<sup>b</sup> Hypertension was defined as diastolic blood pressure (DBP)  $\geq$ 90mmHg and / or systolic blood pressure (SBP)  $\geq$ 140mmHg, or self-reported hypertension diagnosed by a physician, or taking antihypertension drugs.

<sup>c</sup> Diabetes was defined as fasting blood glucose value  $\geq$ 7.0 mmol/l or antidiabetic therapy, or self-reported diabetes diagnosed by a physician, or taking hypoglycemic agent or insulin.

<sup>d</sup> Dyslipidemia was defined as TCHO  $\geq$ 5.18 mmol/L, or TG  $\geq$ 1.7 mmol/L, or HDL-C  $<$ 1.0 mmol/L, or LDL-C  $\geq$ 3.37 mmol/L or self-reported hyperlipidemia diagnosis by a physician, or taking lipid-lowering drugs.

<sup>e</sup> The disease was defined as self-reported disease.

<sup>f</sup> Depression was defined as having at least 16 scores in the Center for Epidemiologic Studies Depression Scale.
